# Supplementary material for: Bibliometric analysis of the uveitis literature and research trends over the past two decades
Source: HighWire-hosted journal article supplement (doi:10.1136/bmjophth-2023-001330), 2023-09-01
Supplement: bmjophth-2023-001330supp001_data_supplement.pdf [file bmjophth-2023-001330supp001_data_supplement.pdf]

**Supplementary table 1.** Specific search strategies used for each database

| Database        | Search strategy                                                                                                                                                                                                                                                                                                                                                                                                                                                                                                                                                                                                                                                                                                                                                                                                                                                                                                                                                                                                                                                                                                                                                                                                                                     |    |             |    |                                                         |    |                                                |    |                                                     |    |                                                |    |                                                     |    |                                                       |    |                                                         |    |                                                                |    |                                                            |     |                                                    |     |                                                    |     |                                             |     |                                               |
|-----------------|-----------------------------------------------------------------------------------------------------------------------------------------------------------------------------------------------------------------------------------------------------------------------------------------------------------------------------------------------------------------------------------------------------------------------------------------------------------------------------------------------------------------------------------------------------------------------------------------------------------------------------------------------------------------------------------------------------------------------------------------------------------------------------------------------------------------------------------------------------------------------------------------------------------------------------------------------------------------------------------------------------------------------------------------------------------------------------------------------------------------------------------------------------------------------------------------------------------------------------------------------------|----|-------------|----|---------------------------------------------------------|----|------------------------------------------------|----|-----------------------------------------------------|----|------------------------------------------------|----|-----------------------------------------------------|----|-------------------------------------------------------|----|---------------------------------------------------------|----|----------------------------------------------------------------|----|------------------------------------------------------------|-----|----------------------------------------------------|-----|----------------------------------------------------|-----|---------------------------------------------|-----|-----------------------------------------------|
| <b>MEDLINE</b>  | <p>Ovid MEDLINE: Epub Ahead of Print, In-Process &amp; Other Non-Indexed Citations, Ovid MEDLINE® Daily and Ovid MEDLINE® &lt;1946-Present&gt;</p> <p>1 *retinal vasculitis/ or *retinitis/ or *chorioretinitis/ or *scleritis/ or *uveal diseases/ or *choroid diseases/ or *choroiditis/ or *birdshot chorioretinopathy/ or *multifocal choroiditis/ or *pars planitis/ or *iridocyclitis/ or *iritis/ or *uveitis/ or *panuveitis/ or *uveitis, anterior/ or *behcet syndrome/ or *uveitis, posterior/ or *white dot syndromes/ or *uveitis, intermediate/ 33073<br/> 2 exp animals/ not humans.sh. 5006281<br/> 3 1 not 2 30361<br/> 4 limit 3 to yr="2000 -Current" 17903<br/> 5 limit 4 to english language 15962</p>                                                                                                                                                                                                                                                                                                                                                                                                                                                                                                                         |    |             |    |                                                         |    |                                                |    |                                                     |    |                                                |    |                                                     |    |                                                       |    |                                                         |    |                                                                |    |                                                            |     |                                                    |     |                                                    |     |                                             |     |                                               |
| <b>Embase</b>   | <p>Embase Classic+Embase</p> <p>1 *retina vasculitis/ or *retinitis/ or *chorioretinitis/ or *scleritis/ or *choroiditis/ or *birdshot chorioretinopathy/ or *multifocal choroiditis/ or *intermediate uveitis/ or *iridocyclitis/ or *iritis/ or *uveitis/ or *iridocyclitis/ or *behcet disease/ or *white dot syndrome/ or *uveitis, intermediate/ [****Original MeSH terms - EMBASE indexing****] 38357<br/> 2 *exudative retinitis/ or *uveoretinitis/ or *autoimmune uveitis/ or *vogt koyanagi syndrome/ or *blau syndrome/ or *keratouveitis/ or *uveoretinitis/ or *iridocyclitis/ [***Possible EMBASE terms not used in MEDLINE as MeSH terms****] 6756<br/> 3 1 or 2 41346<br/> 4 exp animal/ not exp human/ 5738001<br/> 5 3 not 4 38422<br/> 6 limit 5 to yr="2000 -Current" 21968<br/> 7 limit 6 to english language 19677<br/> 8 limit 7 to (conference abstract or conference paper or "conference review") 3554<br/> 9 7 not 8 16123</p>                                                                                                                                                                                                                                                                                           |    |             |    |                                                         |    |                                                |    |                                                     |    |                                                |    |                                                     |    |                                                       |    |                                                         |    |                                                                |    |                                                            |     |                                                    |     |                                                    |     |                                             |     |                                               |
| <b>Cochrane</b> | <table border="0"> <thead> <tr> <th>ID</th> <th>Search Hits</th> </tr> </thead> <tbody> <tr> <td>#1</td> <td>MeSH descriptor: [Retinal Vasculitis] this term only 12</td> </tr> <tr> <td>#2</td> <td>MeSH descriptor: [Retinitis] this term only 95</td> </tr> <tr> <td>#3</td> <td>MeSH descriptor: [Choroiditis] explode all trees 50</td> </tr> <tr> <td>#4</td> <td>MeSH descriptor: [Scleritis] this term only 13</td> </tr> <tr> <td>#5</td> <td>MeSH descriptor: [Uveal Diseases] this term only 10</td> </tr> <tr> <td>#6</td> <td>MeSH descriptor: [Choroid Diseases] this term only 38</td> </tr> <tr> <td>#7</td> <td>MeSH descriptor: [Chorioretinitis] explode all trees 22</td> </tr> <tr> <td>#8</td> <td>MeSH descriptor: [Birdshot Chorioretinopathy] this term only 0</td> </tr> <tr> <td>#9</td> <td>MeSH descriptor: [Multifocal Choroiditis] this term only 0</td> </tr> <tr> <td>#10</td> <td>MeSH descriptor: [Pars Planitis] this term only 22</td> </tr> <tr> <td>#11</td> <td>MeSH descriptor: [Iridocyclitis] this term only 30</td> </tr> <tr> <td>#12</td> <td>MeSH descriptor: [Iritis] this term only 22</td> </tr> <tr> <td>#13</td> <td>MeSH descriptor: [Uveitis] this term only 283</td> </tr> </tbody> </table> | ID | Search Hits | #1 | MeSH descriptor: [Retinal Vasculitis] this term only 12 | #2 | MeSH descriptor: [Retinitis] this term only 95 | #3 | MeSH descriptor: [Choroiditis] explode all trees 50 | #4 | MeSH descriptor: [Scleritis] this term only 13 | #5 | MeSH descriptor: [Uveal Diseases] this term only 10 | #6 | MeSH descriptor: [Choroid Diseases] this term only 38 | #7 | MeSH descriptor: [Chorioretinitis] explode all trees 22 | #8 | MeSH descriptor: [Birdshot Chorioretinopathy] this term only 0 | #9 | MeSH descriptor: [Multifocal Choroiditis] this term only 0 | #10 | MeSH descriptor: [Pars Planitis] this term only 22 | #11 | MeSH descriptor: [Iridocyclitis] this term only 30 | #12 | MeSH descriptor: [Iritis] this term only 22 | #13 | MeSH descriptor: [Uveitis] this term only 283 |
| ID              | Search Hits                                                                                                                                                                                                                                                                                                                                                                                                                                                                                                                                                                                                                                                                                                                                                                                                                                                                                                                                                                                                                                                                                                                                                                                                                                         |    |             |    |                                                         |    |                                                |    |                                                     |    |                                                |    |                                                     |    |                                                       |    |                                                         |    |                                                                |    |                                                            |     |                                                    |     |                                                    |     |                                             |     |                                               |
| #1              | MeSH descriptor: [Retinal Vasculitis] this term only 12                                                                                                                                                                                                                                                                                                                                                                                                                                                                                                                                                                                                                                                                                                                                                                                                                                                                                                                                                                                                                                                                                                                                                                                             |    |             |    |                                                         |    |                                                |    |                                                     |    |                                                |    |                                                     |    |                                                       |    |                                                         |    |                                                                |    |                                                            |     |                                                    |     |                                                    |     |                                             |     |                                               |
| #2              | MeSH descriptor: [Retinitis] this term only 95                                                                                                                                                                                                                                                                                                                                                                                                                                                                                                                                                                                                                                                                                                                                                                                                                                                                                                                                                                                                                                                                                                                                                                                                      |    |             |    |                                                         |    |                                                |    |                                                     |    |                                                |    |                                                     |    |                                                       |    |                                                         |    |                                                                |    |                                                            |     |                                                    |     |                                                    |     |                                             |     |                                               |
| #3              | MeSH descriptor: [Choroiditis] explode all trees 50                                                                                                                                                                                                                                                                                                                                                                                                                                                                                                                                                                                                                                                                                                                                                                                                                                                                                                                                                                                                                                                                                                                                                                                                 |    |             |    |                                                         |    |                                                |    |                                                     |    |                                                |    |                                                     |    |                                                       |    |                                                         |    |                                                                |    |                                                            |     |                                                    |     |                                                    |     |                                             |     |                                               |
| #4              | MeSH descriptor: [Scleritis] this term only 13                                                                                                                                                                                                                                                                                                                                                                                                                                                                                                                                                                                                                                                                                                                                                                                                                                                                                                                                                                                                                                                                                                                                                                                                      |    |             |    |                                                         |    |                                                |    |                                                     |    |                                                |    |                                                     |    |                                                       |    |                                                         |    |                                                                |    |                                                            |     |                                                    |     |                                                    |     |                                             |     |                                               |
| #5              | MeSH descriptor: [Uveal Diseases] this term only 10                                                                                                                                                                                                                                                                                                                                                                                                                                                                                                                                                                                                                                                                                                                                                                                                                                                                                                                                                                                                                                                                                                                                                                                                 |    |             |    |                                                         |    |                                                |    |                                                     |    |                                                |    |                                                     |    |                                                       |    |                                                         |    |                                                                |    |                                                            |     |                                                    |     |                                                    |     |                                             |     |                                               |
| #6              | MeSH descriptor: [Choroid Diseases] this term only 38                                                                                                                                                                                                                                                                                                                                                                                                                                                                                                                                                                                                                                                                                                                                                                                                                                                                                                                                                                                                                                                                                                                                                                                               |    |             |    |                                                         |    |                                                |    |                                                     |    |                                                |    |                                                     |    |                                                       |    |                                                         |    |                                                                |    |                                                            |     |                                                    |     |                                                    |     |                                             |     |                                               |
| #7              | MeSH descriptor: [Chorioretinitis] explode all trees 22                                                                                                                                                                                                                                                                                                                                                                                                                                                                                                                                                                                                                                                                                                                                                                                                                                                                                                                                                                                                                                                                                                                                                                                             |    |             |    |                                                         |    |                                                |    |                                                     |    |                                                |    |                                                     |    |                                                       |    |                                                         |    |                                                                |    |                                                            |     |                                                    |     |                                                    |     |                                             |     |                                               |
| #8              | MeSH descriptor: [Birdshot Chorioretinopathy] this term only 0                                                                                                                                                                                                                                                                                                                                                                                                                                                                                                                                                                                                                                                                                                                                                                                                                                                                                                                                                                                                                                                                                                                                                                                      |    |             |    |                                                         |    |                                                |    |                                                     |    |                                                |    |                                                     |    |                                                       |    |                                                         |    |                                                                |    |                                                            |     |                                                    |     |                                                    |     |                                             |     |                                               |
| #9              | MeSH descriptor: [Multifocal Choroiditis] this term only 0                                                                                                                                                                                                                                                                                                                                                                                                                                                                                                                                                                                                                                                                                                                                                                                                                                                                                                                                                                                                                                                                                                                                                                                          |    |             |    |                                                         |    |                                                |    |                                                     |    |                                                |    |                                                     |    |                                                       |    |                                                         |    |                                                                |    |                                                            |     |                                                    |     |                                                    |     |                                             |     |                                               |
| #10             | MeSH descriptor: [Pars Planitis] this term only 22                                                                                                                                                                                                                                                                                                                                                                                                                                                                                                                                                                                                                                                                                                                                                                                                                                                                                                                                                                                                                                                                                                                                                                                                  |    |             |    |                                                         |    |                                                |    |                                                     |    |                                                |    |                                                     |    |                                                       |    |                                                         |    |                                                                |    |                                                            |     |                                                    |     |                                                    |     |                                             |     |                                               |
| #11             | MeSH descriptor: [Iridocyclitis] this term only 30                                                                                                                                                                                                                                                                                                                                                                                                                                                                                                                                                                                                                                                                                                                                                                                                                                                                                                                                                                                                                                                                                                                                                                                                  |    |             |    |                                                         |    |                                                |    |                                                     |    |                                                |    |                                                     |    |                                                       |    |                                                         |    |                                                                |    |                                                            |     |                                                    |     |                                                    |     |                                             |     |                                               |
| #12             | MeSH descriptor: [Iritis] this term only 22                                                                                                                                                                                                                                                                                                                                                                                                                                                                                                                                                                                                                                                                                                                                                                                                                                                                                                                                                                                                                                                                                                                                                                                                         |    |             |    |                                                         |    |                                                |    |                                                     |    |                                                |    |                                                     |    |                                                       |    |                                                         |    |                                                                |    |                                                            |     |                                                    |     |                                                    |     |                                             |     |                                               |
| #13             | MeSH descriptor: [Uveitis] this term only 283                                                                                                                                                                                                                                                                                                                                                                                                                                                                                                                                                                                                                                                                                                                                                                                                                                                                                                                                                                                                                                                                                                                                                                                                       |    |             |    |                                                         |    |                                                |    |                                                     |    |                                                |    |                                                     |    |                                                       |    |                                                         |    |                                                                |    |                                                            |     |                                                    |     |                                                    |     |                                             |     |                                               |

|     |                                                                                 |     |
|-----|---------------------------------------------------------------------------------|-----|
| #14 | MeSH descriptor: [Panuveitis] this term only                                    | 33  |
| #15 | MeSH descriptor: [Uveitis, Anterior] this term only                             | 166 |
| #16 | MeSH descriptor: [Behcet Syndrome] this term only                               | 135 |
| #17 | MeSH descriptor: [Uveitis, Posterior] this term only                            | 58  |
| #18 | MeSH descriptor: [White Dot Syndromes] this term only                           | 0   |
| #19 | MeSH descriptor: [Uveitis, Intermediate] this term only                         | 42  |
| #20 | {or #1-#19} with Cochrane Library publication date Between Jan 2000 and Current | 612 |
