# Supplementary material for: Bibliometric analysis of the uveitis literature and research trends over the past two decades
Source: HighWire-hosted journal article supplement (doi:10.1136/bmjophth-2023-001330), 2023-09-01
Supplement: bmjophth-2023-001330supp003_data_supplement.pdf [file bmjophth-2023-001330supp003_data_supplement.pdf]

**Supplementary table 3.** Distribution of authors' publishing status by number of articles published

| <b>No. of articles published</b> | <b>No. of authors</b> | <b>Observed proportion of authors</b> |
|----------------------------------|-----------------------|---------------------------------------|
| 1                                | 29589                 | 0.566                                 |
| 2                                | 11890                 | 0.228                                 |
| 3                                | 3398                  | 0.065                                 |
| 4                                | 2109                  | 0.04                                  |
| 5                                | 1100                  | 0.021                                 |
| 6                                | 888                   | 0.017                                 |
| 7                                | 573                   | 0.011                                 |
| 8                                | 421                   | 0.008                                 |
| 9                                | 304                   | 0.006                                 |
| 10                               | 228                   | 0.004                                 |
