# Supplementary material for: Bibliometric analysis of the uveitis literature and research trends over the past two decades
Source: HighWire-hosted journal article supplement (doi:10.1136/bmjophth-2023-001330), 2023-09-01
Supplement: bmjophth-2023-001330supp004_data_supplement.pdf [file bmjophth-2023-001330supp004_data_supplement.pdf]

**Supplementary table 4.** The top 10 most frequently indexed keywords in the five categories of general terms, imaging terms, treatment terms, disease terms and types of study.

|                                   |       |
|-----------------------------------|-------|
| <b>General Terms:</b>             |       |
| • humans                          | 17515 |
| • male                            | 10623 |
| • female                          | 10247 |
| • adult                           | 8319  |
| • middle aged                     | 6885  |
| • aged                            | 3543  |
| • adolescent                      | 2838  |
| • young adult                     | 2110  |
| • child                           | 2038  |
| • aged 80 and over                | 1169  |
| <b>Imaging/diagnostic Terms:</b>  |       |
| • fluorescein angiography         | 2123  |
| • tomography optical coherence    | 1560  |
| • magnetic resonance imaging      | 555   |
| • fluorescein angiography/methods | 504   |
| • tomography x-ray computed       | 388   |
| • indocyanine green               | 358   |
| • ultrasonography                 | 304   |
| • biopsy                          | 254   |
| • coloring agents                 | 248   |
| • biomarkers/blood                | 213   |
| <b>Treatment Terms:</b>           |       |
| • glucocorticoids/therapeutic use | 1082  |
| • drug therapy combination        | 769   |
| • infliximab                      | 451   |
| • anti-inflammatory agents        | 412   |
| • vitrectomy                      | 319   |
| • anti-bacterial agents           | 259   |
| • adalimumab                      | 208   |
| • prednisone/therapeutic use      | 53    |
| • lens implantation intraocular   | 39    |
| • phacoemulsification             | 33    |
| <b>Disease Terms:</b>             |       |
| • behcet's                        | 1804  |
| • uveitis                         | 1215  |
| • acute disease                   | 672   |
| • chronic disease                 | 458   |
| • disease progression             | 393   |
| • retina/pathology                | 289   |
| • choroid/pathology               | 288   |
| • inflammation                    | 285   |
| • choroid diseases/diagnosis      | 277   |
| • Behcet syndrome                 | 254   |
| <b>Types of Study:</b>            |       |
| • Retrospective studies           | 3156  |

|                              |      |
|------------------------------|------|
| ● prospective studies        | 1071 |
| ● follow-up studies          | 1757 |
| ● case-control studies       | 937  |
| ● cross-sectional studies    | 475  |
| ● cohort studies             | 311  |
| ● double-blind method        | 207  |
| ● surveys and questionnaires | 197  |
| ● risk assessment            | 159  |
| ● clinical trials as topic   | 109  |

*Note: The five main keyword categories were selected by authors. Based on the themes of the terms identified within each category, the top ten terminologies are selected. The terms within each category appear in the order of highest to lowest occurrence.*
